# Supplementary material
Source: Springer Nature journal article supplement (https://www.springermedizin.de/resource/supplementary/13256_2012_2320_MOESM5_ESM.pdf/9649490)

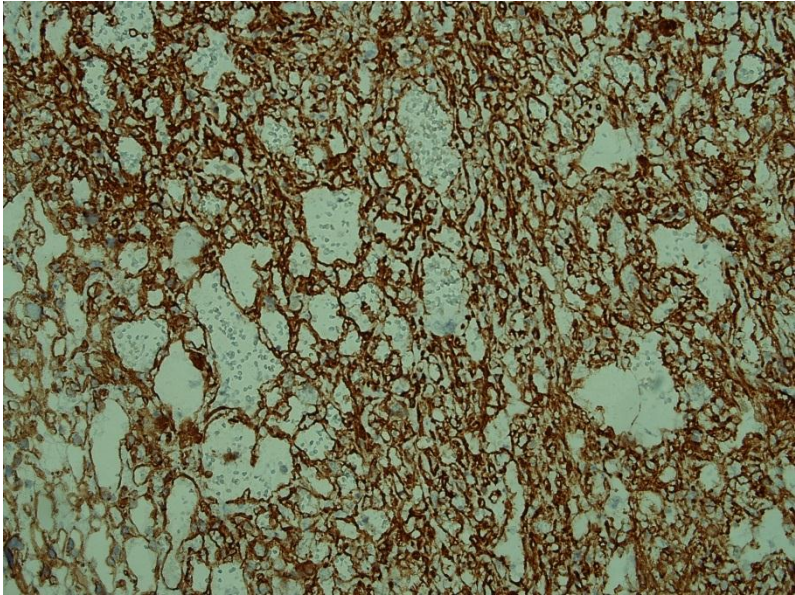

A

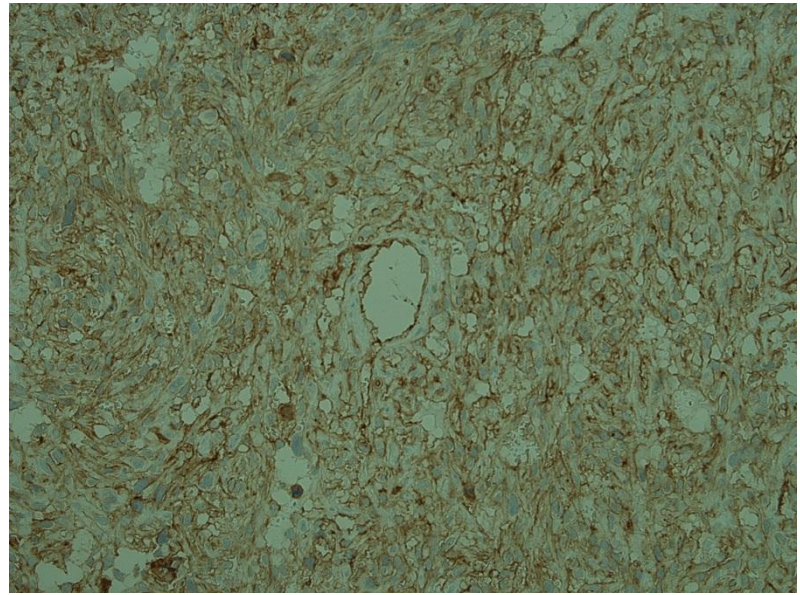

B

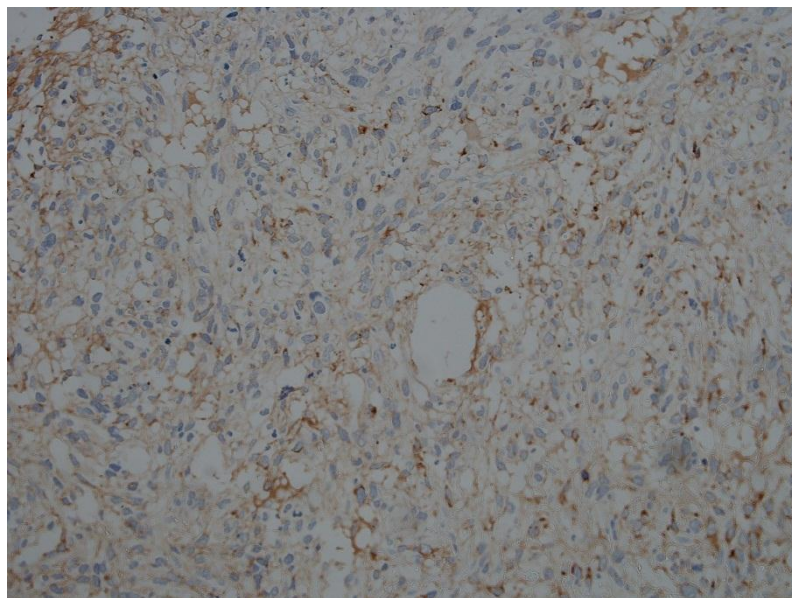

C

Supplement: MOESM5 [file 9649490]
